# Supplementary material for: Capture of Neuroepithelial-Like Stem Cells from Pluripotent Stem Cells Provides a Versatile System for In Vitro Production of Human Neurons
Source: PubMed Central journal article supplement (PMC3260177; doi:10.1371/journal.pone.0029597), 2012-01-17
Supplement: pone.0029597.s008.pdf [file pone.0029597.s008.pdf]

| Gene                 | Edi-2 | Edi-2 | DF-3F | DF-3F | CB541 | CB541 | CB660 | CB660 | CB192 | CB192 | AF22  | AF22  | AF23  | AF23  | AF24  | AF24  | PKb   | PKb   | PKc   | PKc   | Pka   | Pka   | PKd   | PKd   | I3    | I3    | H9.2  | H9.2  |    |
|----------------------|-------|-------|-------|-------|-------|-------|-------|-------|-------|-------|-------|-------|-------|-------|-------|-------|-------|-------|-------|-------|-------|-------|-------|-------|-------|-------|-------|-------|----|
| 18S-Hs99999901_s1    | 8.904 | 8.952 | 8.868 | 9.036 | 10.08 | 10.27 | 9.138 | 9.075 | 8.812 | 8.895 | 8.583 | 8.434 | 8.46  | 8.522 | 8.816 | 8.998 | 9.754 | 9.92  | 10.14 | 9.887 | 9.364 | 9.437 | 9.422 | 8.912 | 10.56 | 10.24 | 9.466 | 9.72  |    |
| AQP4-Hs00242342_m1   | 34.19 | 33.3  | 31    | 30.6  | 33.7  | 33.57 | 30.8  | 30.28 | 31.6  | 31.66 | 31.4  | 31.79 | 30.53 | 30.71 | 30.76 | 30.18 | 32.3  | 31.94 | 29.79 | 29.79 | 32.52 | 31.72 | 31.49 | 31.92 | 37.04 | 35.13 | 33.68 | 33.93 |    |
| ASCL1-Hs00269932_m1  | 32.32 | 33.13 | 27.21 | 27.31 | 26.82 | 26.81 | 27.31 | 27.3  | 32.51 | 32.33 | 30.14 | 30.22 | 28.09 | 28.19 | 30.1  | 29.91 | 25.53 | 25.72 | 22.62 | 22.64 | 22.77 | 22.88 | 27.71 | 27.99 | 26.61 | 26.6  | 26.99 | 27.11 |    |
| ASPM-Hs00411505_m1   | 25.15 | 25.04 | 24.25 | 24.41 | 27.88 | 27.67 | 25.76 | 25.56 | 25.41 | 25.61 | 23    | 23.21 | 22.83 | 23.12 | 23.77 | 23.94 | 23.55 | 23.61 | 24.38 | 24.66 | 24.28 | 24.29 | 23.35 | 23.25 | 23.99 | 24.18 | 22.67 | 22.56 |    |
| ATF4-Hs00909568_g1   | 22.12 | 21.98 | 21.22 | 21.28 | 24.88 | 24.67 | 23.27 | 23.39 | 22.64 | 22.73 | 20.69 | 20.72 | 21.36 | 21.04 | 21.27 | 21.22 | 21.23 | 21.43 | 21.21 | 21.12 | 21.39 | 21.45 | 21.44 | 20.9  | 21.57 | 21.86 | 21.51 | 21.77 |    |
| ATOH1-Hs00245453_s1  | 30.41 | 30.67 | 28.85 | 28.96 | 34.87 | 36.04 | 40    | 36.18 | 40    | 40    | 35.08 | 34.6  | 36.82 | 34    | 34.63 | 34.55 | 34.34 | 35.94 | 35.42 | 40    | 33.89 | 35.64 | 35.43 | 34    | 40    | 36.28 | 35.3  | 40    |    |
| BMI1-Hs00180411_m1   | 26.8  | 26.75 | 27.18 | 27.33 | 28.72 | 28.64 | 27.7  | 27.84 | 27.32 | 27.33 | 25.32 | 25.35 | 24.82 | 24.63 | 25.66 | 25.35 | 25.22 | 25.37 | 25.08 | 25.26 | 23.79 | 25.42 | 25.14 | 25.38 | 25.9  | 26.01 | 25.72 | 25.72 |    |
| CALB1-Hs00191821_m1  | 26.16 | 26.06 | 22.41 | 22.21 | 25.84 | 25.91 | 24.07 | 24.01 | 21.48 | 21.28 | 23.49 | 23.45 | 26.24 | 26.31 | 23.97 | 23.84 | 25.41 | 25.34 | 25.07 | 25.1  | 30.31 | 30.09 | 28.5  | 28.19 | 28.68 | 28.75 | 29.03 | 28.62 |    |
| CALB2-Hs00418693_m1  | 29.23 | 30.68 | 29.66 | 29.79 | 40    | 40    | 33.97 | 32.97 | 35.58 | 35.98 | 25.98 | 25.73 | 32.78 | 32.63 | 30.67 | 31.02 | 35.14 | 35.49 | 30.66 | 30.35 | 30.82 | 30.66 | 35.1  | 35.34 | 33.12 | 40    | 34.4  | 33.52 |    |
| CD44-Hs00153304_m1   | 24.67 | 24.55 | 26.6  | 26.4  | 24.49 | 24.58 | 26.12 | 26.02 | 21.4  | 21.32 | 26.03 | 25.94 | 26.89 | 26.65 | 28.92 | 29    | 29.14 | 28.99 | 26.83 | 26.79 | 29.39 | 29.37 | 31.71 | 31.31 | 27.72 | 27.71 | 29.07 | 28.9  |    |
| 18S-Hs99999901_s1    | 9.074 | 9.055 | 9.155 | 9.049 | 10.46 | 10.33 | 9.514 | 9.413 | 9.187 | 8.994 | 8.795 | 8.861 | 8.59  | 8.591 | 9.148 | 9.051 | 9.839 | 9.931 | 9.987 | 10.06 | 9.298 | 9.424 | 9.534 | 9.391 | 10.75 | 10.63 | 9.784 | 9.408 |    |
| CDK4-Hs00364847_m1   | 22.67 | 22.69 | 22.31 | 22.31 | 24.43 | 24.41 | 23.11 | 23.13 | 22.81 | 22.91 | 20.68 | 20.68 | 20.52 | 20.64 | 21.51 | 21.66 | 21.55 | 21.5  | 21.68 | 21.82 | 21.95 | 22.05 | 21.03 | 21.26 | 21.9  | 21.92 | 20.93 | 20.8  |    |
| CDK6-Hs00608037_m1   | 24.81 | 24.89 | 25.3  | 25.02 | 24.77 | 24.77 | 24.76 | 24.75 | 24.25 | 24.11 | 22.29 | 22.07 | 23.21 | 22.99 | 22.99 | 22.73 | 25.26 | 25.03 | 22.32 | 22.06 | 22.5  | 22.49 | 23.23 | 23.09 | 25.16 | 24.98 | 25.12 | 25.06 |    |
| CHAT-Hs00252848_m1   | 40    | 40    | 35.45 | 40    | 40    | 40    | 35.9  | 35.43 | 40    | 40    | 33.44 | 33.81 | 34.39 | 34.95 | 34.09 | 34.42 | 34.2  | 34.41 | 28.33 | 28.28 | 27.86 | 28.25 | 34.04 | 34.57 | 35.64 | 36.9  | 40    | 37.26 |    |
| CHRM1-Hs00912795_m1  | 37.24 | 35.45 | 33.94 | 35.16 | 40    | 40    | 40    | 40    | 40    | 40    | 40    | 40    | 40    | 40    | 40    | 40    | 36.58 | 40    | 40    | 40    | 40    | 40    | 40    | 40    | 40    | 40    | 40    | 40    | 40 |
| CHRNA1-Hs00175578_m1 | 33.97 | 33.35 | 30.8  | 31.03 | 30.06 | 29.91 | 28.19 | 28.17 | 29.92 | 29.58 | 30.14 | 30.03 | 32.99 | 34.13 | 32.76 | 32.64 | 31.69 | 31.44 | 30.01 | 29.87 | 26.91 | 26.96 | 32.78 | 32.76 | 34.5  | 34.52 | 34.49 | 34.59 |    |
| CITED2-Hs01897804_s1 | 26.41 | 26.34 | 25.43 | 25.4  | 28.89 | 28.9  | 26.7  | 26.72 | 27.87 | 27.98 | 24.46 | 24.53 | 24.35 | 24.05 | 24.87 | 24.99 | 24.06 | 24.52 | 24.04 | 24.08 | 24.44 | 24.54 | 26.26 | 26.15 | 26.18 | 26.23 | 26.09 | 25.99 |    |
| CITED4-Hs00388363_s1 | 26.76 | 26.68 | 26.07 | 25.91 | 30.27 | 29.57 | 28.14 | 27.95 | 26.77 | 26.62 | 26.19 | 25.9  | 25.84 | 25.35 | 26.39 | 26.09 | 25.61 | 25.46 | 26.33 | 26.05 | 26.45 | 26.27 | 25.55 | 25.52 | 26.18 | 25.96 | 25.22 | 25    |    |
| CLDN11-Hs00194440_m1 | 28.18 | 27.97 | 27.33 | 27.33 | 40    | 36    | 31.48 | 31.25 | 30.11 | 29.91 | 29.38 | 29.34 | 29.69 | 29.64 | 31.26 | 31.12 | 33.03 | 33.11 | 33.3  | 34.44 | 34.6  | 35.56 | 34.24 | 33.39 | 35.68 | 40    | 35.7  | 34.85 |    |
| CSPG4-Hs00426981_m1  | 29.27 | 29.67 | 28.33 | 28.43 | 32    | 32.52 | 29.2  | 29.13 | 28.33 | 28.24 | 28.78 | 28.62 | 29.96 | 30.12 | 29.32 | 29.92 | 30.56 | 30.91 | 30.27 | 29.66 | 29.73 | 29.64 | 32.69 | 35.79 | 29.14 | 29.23 | 29.56 | 29.7  |    |
| CXCR4-Hs02330069_s1  | 31.24 | 31.61 | 34.26 | 33.62 | 40    | 40    | 32.63 | 32.41 | 30.79 | 30.63 | 33.34 | 33.73 | 32.02 | 32.92 | 33.08 | 33.57 | 30.72 | 31.02 | 27.13 | 27.51 | 27.63 | 27.53 | 27.44 | 27.49 | 30.78 | 30.61 | 28.03 | 28.08 |    |
| DACH1-Hs00189301_m1  | 29.21 | 29.03 | 29.82 | 29.79 | 32.47 | 31.91 | 28.42 | 28.33 | 25.88 | 25.78 | 27.33 | 27.18 | 26.73 | 26.91 | 27.26 | 26.97 | 24.46 | 24.26 | 23.97 | 23.74 | 24.44 | 24.34 | 23.49 | 23.49 | 24.55 | 24.62 | 24.67 | 24.54 |    |
| DCX-Hs01035496_m1    | 30.27 | 30.5  | 29.25 | 29.25 | 33.98 | 35.31 | 29.38 | 29.85 | 40    | 40    | 31.19 | 31.78 | 29.22 | 29.07 | 30.7  | 30.93 | 26.42 | 26.92 | 24.29 | 24.32 | 25.55 | 25.33 | 26.76 | 26.74 | 27.13 | 27.27 | 26.51 | 26.44 |    |
| DLL1-Hs01011325_g1   | 30.59 | 30.57 | 27.21 | 27.71 | 29.2  | 29.22 | 28.77 | 28.75 | 29.28 | 29.16 | 29.31 | 29.44 | 26.33 | 26.45 | 28.71 | 28.75 | 24.45 | 24.66 | 23.59 | 23.48 | 23.97 | 24.02 | 24.56 | 24.4  | 25.45 | 25.46 | 25.14 | 24.88 |    |
| DLL4-Hs00184092_m1   | 34.97 | 35.11 | 32.06 | 32.22 | 35.17 | 34.47 | 35.93 | 34.48 | 34.33 | 33.96 | 35.57 | 34.08 | 40    | 34.79 | 34.67 | 35.03 | 29.79 | 29.56 | 28.75 | 28.79 | 28.06 | 27.91 | 30.37 | 30.25 | 32.96 | 32.36 | 32.59 | 33.23 |    |
| DLX1-Hs00698288_m1   | 33.5  | 33.97 | 31.42 | 31.15 | 27.93 | 27.81 | 26.4  | 26.32 | 28.45 | 28.44 | 28.36 | 28.28 | 31.74 | 31.64 | 29.61 | 29.74 | 28.08 | 28.05 | 23.77 | 23.82 | 23.26 | 23.59 | 32.69 | 33.38 | 33.89 | 32.49 | 31.99 | 31.62 |    |
| DLX2-Hs00269993_m1   | 33.06 | 34.15 | 30.7  | 30.72 | 29.88 | 30    | 26.5  | 26.62 | 30.33 | 30.35 | 28.8  | 28.88 | 33.19 | 33.19 | 30.65 | 30.42 | 28.02 | 28.06 | 24.01 | 23.98 | 23.28 | 23.22 | 30.47 | 30.84 | 34.22 | 34.62 | 32.32 | 32.87 |    |
| DLX5-Hs00193291_m1   | 30.43 | 30.22 | 32.59 | 32.08 | 35.36 | 35.3  | 28.37 | 28.63 | 35.86 | 40    | 32.6  | 34.42 | 40    | 40    | 35.92 | 34.9  | 30.98 | 30.71 | 28.69 | 28.68 | 25.97 | 26.09 | 40    | 40    | 40    | 40    | 40    | 40    |    |
| DLX6-Hs00231999_m1   | 36.08 | 35.11 | 34.72 | 34.45 | 40    | 37.07 | 31.44 | 31.15 | 40    | 40    | 37.08 | 35.94 | 40    | 40    | 40    | 36.2  | 32.99 | 34.19 | 30.76 | 30.63 | 29.12 | 29.2  | 37.83 | 40    | 40    | 40    | 40    | 40    |    |
| E2F1-Hs00153451_m1   | 25.68 | 25.62 | 25.19 | 25.17 | 27.15 | 27.14 | 25.83 | 25.85 | 25.08 | 25.03 | 23.23 | 23.26 | 22.8  | 22.86 | 23.67 | 23.73 | 23.79 | 23.74 | 23.76 | 23.75 | 24.17 | 24.11 | 23.02 | 22.99 | 24.04 | 24.1  | 23.14 | 23.03 |    |
| E2F8-Hs00226635_m1   | 28.62 | 28.84 | 28.46 | 28.42 | 31.23 | 31.51 | 29.36 | 29.27 | 28.51 | 28.55 | 27.67 | 27.54 | 27.51 | 27.93 | 28    | 28.24 | 28.89 | 29.29 | 29.15 | 29.17 | 29.51 | 29.5  | 26.93 | 26.84 | 30.37 | 30.42 | 29.02 | 29.06 |    |
| EGFR-Hs01076092_m1   | 28.35 | 28.2  | 27.85 | 28.4  | 29.06 | 29.35 | 26.89 | 26.71 | 25.48 | 25.74 | 26.48 | 26.63 | 25.97 | 25.64 | 25.57 | 25.91 | 25.62 | 25.75 | 28.81 | 28.94 | 27.18 | 27.13 | 24.85 | 25.08 | 26.15 | 26.19 | 24.97 | 24.73 |    |
| EGR2-Hs00166165_m1   | 32.41 | 31.63 | 29.05 | 28.96 | 29.67 | 29.73 | 28.15 | 28.1  | 27.4  | 27.26 | 29.59 | 29.44 | 29.68 | 29.2  | 29.05 | 28.73 | 26.3  | 26.27 | 28.77 | 28.72 | 25.75 | 25.69 | 22.23 | 22.32 | 26.13 | 26.24 | 24.81 | 24.62 |    |
| EMX1-Hs00417957_m1   | 31.26 | 31.51 | 30.7  | 31.26 | 40    | 40    | 40    | 40    | 40    | 40    | 40    | 40    | 40    | 35.66 | 40    | 40    | 40    | 40    | 40    | 40    | 40    | 40    | 40    | 40    | 40    | 40    | 40    | 40    | 40 |
| EMX2-Hs00244574_m1   | 40    | 40    | 37.21 | 36.66 | 40    | 40    | 36.35 | 36.12 | 40    | 40    | 31.38 | 30.68 | 30.05 | 29.64 | 40    | 40    | 36.5  | 35.35 | 32.5  | 31.59 | 40    | 40    | 40    | 40    | 26.95 | 27.32 | 40    | 40    |    |
| EN1-Hs00154977_m1    | 36.7  | 40    | 30.73 | 30.7  | 25.9  | 25.91 | 27.19 | 27.31 | 40    | 40    | 28.11 | 28.15 | 31    | 31.19 | 25.73 | 25.73 | 29.82 | 29.86 | 25.16 | 25.09 | 23.7  | 23.69 | 25.41 | 25.49 | 29.29 | 29.42 | 26.2  | 26.25 |    |
| EN2-Hs00171321_m1    | 36.36 | 40    | 29.93 | 29.6  | 27.9  | 27.82 | 31.58 | 31.16 | 40    | 37.32 | 22.63 | 22.61 | 21.56 | 21.36 | 23.45 | 23.14 | 24.87 | 24.8  | 25.97 | 25.72 | 26.44 | 26.3  | 22.45 | 22.46 | 25.67 | 25.38 | 24.81 | 24.62 |    |
| EOMES-Hs00172872_m1  | 25.05 | 24.83 | 30.99 | 31.54 | 40    | 40    | 40    | 36.13 | 36.34 | 34.16 | 40    | 40    | 34.01 | 32.79 | 40    | 40    | 36.98 | 36.19 | 34.57 | 33.31 | 34.54 | 35.97 | 35.45 | 36.28 | 40    | 40    | 36.06 | 36.6  |    |

| Gene                 | Edi-2 | Edi-2 | DF-3F | DF-3F | CB541 | CB541 | CB660 | CB660 | CB192 | CB192 | AF22  | AF22  | AF23  | AF23  | AF24  | AF24  | PKb   | PKb   | PKc   | PKc   | Pka   | Pka   | PKd   | PKd   | I3    | I3    | H9.2  | H9.2  |
|----------------------|-------|-------|-------|-------|-------|-------|-------|-------|-------|-------|-------|-------|-------|-------|-------|-------|-------|-------|-------|-------|-------|-------|-------|-------|-------|-------|-------|-------|
| ERBB2-Hs01001596_g1  | 22.15 | 22.19 | 21.77 | 21.78 | 25.23 | 25.32 | 24.34 | 24.49 | 25.26 | 25.28 | 22.96 | 23    | 22.29 | 22.27 | 23.54 | 23.53 | 23.08 | 23.19 | 23.59 | 23.52 | 23.17 | 23.32 | 22.04 | 22.18 | 23.74 | 23.75 | 22.1  | 22.17 |
| ERBB3-Hs00951455_m1  | 26.15 | 26.36 | 25.37 | 25.3  | 34.24 | 36.62 | 30.57 | 30.87 | 34.2  | 34.56 | 29.44 | 29.72 | 25.76 | 25.83 | 29.88 | 30.08 | 29.56 | 29.53 | 28.83 | 29.07 | 29.34 | 29.25 | 32.61 | 33.33 | 29.42 | 29.41 | 29.62 | 29.17 |
| ERBB4-Hs00171783_m1  | 35.05 | 34.79 | 34.11 | 34.4  | 31.81 | 32.11 | 27.1  | 27.21 | 33.35 | 34.45 | 29.2  | 29.16 | 27.48 | 27.58 | 27.78 | 27.6  | 26.18 | 26.48 | 27.87 | 27.99 | 28.97 | 28.89 | 25.97 | 25.95 | 28.59 | 28.37 | 27.98 | 28.13 |
| ETV1-Hs00290469_s1   | 26.7  | 26.44 | 25.35 | 25.11 | 26.84 | 26.69 | 26.43 | 26.5  | 24.8  | 24.67 | 24.83 | 24.67 | 25.08 | 24.89 | 25.76 | 25.42 | 24.85 | 24.72 | 23.75 | 23.19 | 24.46 | 24.18 | 26.79 | 26.68 | 25.57 | 25.29 | 26.21 | 25.9  |
| ETV5-Hs00231790_m1   | 26.62 | 26.66 | 27.62 | 27.69 | 26.64 | 26.55 | 26.15 | 26.2  | 25.96 | 26.01 | 25.25 | 25.37 | 24.55 | 24.78 | 25.58 | 25.66 | 25.71 | 25.82 | 25.42 | 25.51 | 25.15 | 25.3  | 25.51 | 25.62 | 25.5  | 25.77 | 25.14 | 25.27 |
| EVI1-Hs00602795_m1   | 33.17 | 32.89 | 33.28 | 33.38 | 36.35 | 36.49 | 33.47 | 33.71 | 36.2  | 40    | 31.16 | 30.96 | 31.13 | 31.07 | 33.41 | 33.71 | 32.15 | 32.62 | 29.98 | 29.94 | 28.7  | 28.52 | 33.82 | 34.19 | 30.31 | 30.59 | 32.69 | 32.97 |
| FABP7-Hs00361426_m1  | 29.42 | 29.38 | 26.86 | 26.83 | 23.13 | 23    | 23.65 | 23.5  | 21.84 | 21.78 | 24.4  | 24.41 | 24.43 | 24.35 | 23.79 | 23.6  | 21.9  | 21.55 | 19.93 | 19.75 | 20.05 | 19.96 | 22.36 | 22.38 | 23.43 | 23.1  | 24.32 | 24.48 |
| FAM70A-Hs00215705_m1 | 31.53 | 31.85 | 31.92 | 32.23 | 32.76 | 32.95 | 30.79 | 30.57 | 26.84 | 27.04 | 33.48 | 33.13 | 31.07 | 31.57 | 32.25 | 32.11 | 30.47 | 29.98 | 30.44 | 30.74 | 33.51 | 35.1  | 28.62 | 28.61 | 40    | 40    | 40    | 40    |
| FEV-Hs00232733_m1    | 40    | 40    | 40    | 40    | 40    | 40    | 40    | 40    | 40    | 40    | 40    | 40    | 40    | 40    | 40    | 40    | 40    | 40    | 29.55 | 29.53 | 31.55 | 31.6  | 40    | 40    | 35.85 | 35.45 | 40    | 40    |
| FEZF2-Hs00375188_m1  | 32.83 | 33.5  | 28.1  | 28    | 27.59 | 27.79 | 24.41 | 24.42 | 26.98 | 26.93 | 32.3  | 33.01 | 30.1  | 29.68 | 33.14 | 32.59 | 40    | 40    | 31.36 | 31.88 | 40    | 40    | 40    | 40    | 35.41 | 40    | 40    | 40    |
| FGFR1-Hs00259959_s1  | 27.27 | 26.97 | 26.66 | 26.76 | 29.67 | 29.99 | 28.58 | 28.7  | 28.6  | 28.63 | 27.19 | 27.26 | 27.04 | 26.8  | 27.65 | 27.36 | 26.57 | 26.45 | 27.9  | 27.93 | 27.63 | 27.57 | 26.28 | 26.5  | 27.12 | 27.09 | 26.86 | 26.82 |
| FGFR3-Hs00997393_g1  | 25.14 | 24.96 | 25.19 | 25.01 | 29.14 | 29.42 | 26.36 | 26.41 | 30.56 | 30.59 | 26.63 | 26.84 | 25.61 | 25.5  | 26.1  | 26.19 | 24    | 24.06 | 24.96 | 24.92 | 26.33 | 26.41 | 23.25 | 23.64 | 24.73 | 24.68 | 24.14 | 24.25 |
| FOXA1-Hs00270129_m1  | 32.33 | 32.34 | 35.33 | 35.78 | 33.94 | 35.79 | 32.85 | 32.73 | 36.98 | 36.63 | 40    | 40    | 36.72 | 36.84 | 40    | 40    | 35.89 | 35.49 | 40    | 40    | 40    | 40    | 34.3  | 34.19 | 40    | 40    | 33.34 | 33.21 |
| FOXA2-Hs00232764_m1  | 27.45 | 27.01 | 32.76 | 34.51 | 40    | 40    | 40    | 40    | 40    | 40    | 36.44 | 40    | 40    | 40    | 40    | 40    | 40    | 40    | 40    | 40    | 40    | 40    | 40    | 40    | 40    | 40    | 40    | 40    |
| FOXD3-Hs00255287_s1  | 26.59 | 26.83 | 25.55 | 25.53 | 40    | 40    | 32.7  | 33.42 | 35.8  | 40    | 40    | 35.72 | 33.13 | 32.48 | 33.42 | 36.19 | 34.41 | 40    | 27.58 | 27.72 | 33.7  | 33.42 | 40    | 40    | 35.93 | 36.19 | 35.66 | 34.99 |
| FOXG1-Hs00702391_s1  | 31.7  | 31.95 | 33.48 | 33.05 | 33.5  | 33.64 | 27.5  | 27.49 | 32.7  | 32.52 | 36.96 | 35.56 | 37.21 | 35.24 | 35.5  | 40    | 33.22 | 34.43 | 31    | 31.53 | 40    | 35.11 | 35.94 | 35.49 | 35.75 | 36.81 | 35.51 | 35.24 |
| FOXJ1-Hs00230964_m1  | 30.46 | 30.41 | 31.1  | 30.93 | 30.67 | 30.79 | 29.15 | 29.22 | 33.25 | 33.85 | 29.84 | 30.15 | 27.08 | 26.97 | 29.72 | 29.51 | 28.89 | 28.63 | 27.97 | 28.57 | 28.29 | 28.21 | 27.05 | 27.21 | 30.48 | 30.67 | 28.36 | 28.25 |
| FOXK1-Hs01595620_m1  | 27.44 | 27.56 | 27.33 | 27.53 | 26.98 | 26.68 | 25.83 | 25.41 | 26.74 | 26.5  | 25.53 | 25.11 | 25.36 | 25.47 | 25.45 | 25.58 | 25.57 | 25.99 | 25.34 | 25.66 | 25.28 | 25.18 | 25.25 | 25.78 | 25.36 | 25.61 | 25.76 | 25.81 |
| FOXM1-Hs00153543_m1  | 24.79 | 24.86 | 24.91 | 24.99 | 28.61 | 28.64 | 26.83 | 26.78 | 25.83 | 25.8  | 23.73 | 23.66 | 23.49 | 23.34 | 24.46 | 24.46 | 23.96 | 23.87 | 24.43 | 24.41 | 24.71 | 24.74 | 23.63 | 23.59 | 24.96 | 25.08 | 23.94 | 23.91 |
| FOXO4-Hs00172973_m1  | 28.18 | 28.05 | 27.67 | 27.41 | 32.13 | 32.04 | 30.18 | 30.44 | 31.6  | 31.35 | 30.06 | 30.22 | 27.91 | 27.66 | 29.95 | 30.28 | 28.87 | 28.72 | 29.49 | 29.27 | 29.69 | 29.42 | 29.78 | 29.81 | 29.57 | 29.58 | 29.11 | 28.8  |
| FOXP2-Hs00362817_m1  | 31.93 | 32.38 | 32.31 | 31.66 | 34.18 | 34.48 | 30    | 29.8  | 40    | 40    | 26.41 | 26.35 | 25.56 | 25.65 | 26.78 | 26.68 | 26.32 | 26.08 | 27.32 | 27.07 | 27.43 | 27.41 | 27.03 | 27.02 | 27.65 | 27.5  | 27.57 | 27.52 |
| GAD1-Hs01065893_m1   | 25.28 | 25.29 | 28.27 | 28.06 | 30.82 | 30.75 | 27.98 | 27.93 | 27.02 | 27.1  | 35.66 | 33.57 | 40    | 34.38 | 40    | 34.34 | 30.82 | 30.82 | 26.75 | 26.71 | 24.81 | 25.08 | 30.41 | 30.51 | 27.16 | 27.43 | 26.33 | 26.31 |
| GAPDH-Hs01922876_u1  | 18.6  | 18.62 | 17.72 | 17.77 | 20.12 | 20.19 | 19.47 | 19.46 | 18.58 | 18.49 | 17.21 | 17.29 | 17.22 | 17.28 | 17.88 | 18.03 | 17.64 | 17.65 | 17.89 | 18.05 | 18.07 | 18.07 | 18.27 | 18.16 | 18.43 | 18.65 | 18.18 | 18.4  |
| GBX2-Hs00230965_m1   | 28.45 | 28.51 | 26.72 | 26.72 | 29.7  | 29.79 | 26.11 | 26.04 | 24.25 | 24.27 | 21.39 | 21.19 | 21.94 | 22    | 21.93 | 21.89 | 24.18 | 23.82 | 25.62 | 25.34 | 25.93 | 25.88 | 24.13 | 24.23 | 25.26 | 25.32 | 24.07 | 24.17 |
| GFAP-Hs00909238_g1   | 31.57 | 32.22 | 30.41 | 30.78 | 35.17 | 34.35 | 30.5  | 30.82 | 28.1  | 28.13 | 33.21 | 32.61 | 31.42 | 31.7  | 34    | 33.84 | 33.21 | 34.99 | 32.5  | 32.52 | 35.92 | 40    | 35.21 | 34.5  | 36.08 | 37.54 | 40    | 36.65 |
| GLI1-Hs01110768_m1   | 27.77 | 27.27 | 26.72 | 26.47 | 40    | 35.95 | 28.39 | 27.91 | 31.93 | 33.1  | 29.26 | 29.09 | 29.62 | 29.76 | 29.31 | 29.33 | 29.67 | 29.4  | 29.31 | 30.07 | 28.57 | 28.08 | 28.19 | 28.4  | 29.46 | 29.13 | 25.65 | 25.75 |
| GLI2-Hs01119974_m1   | 26.86 | 26.95 | 26.07 | 26.28 | 35.12 | 36.72 | 28.27 | 28.27 | 28.91 | 29.19 | 25.68 | 25.8  | 25.5  | 25.3  | 26.1  | 26.06 | 25.45 | 25.66 | 26.07 | 26.06 | 25.03 | 25.04 | 24.76 | 24.62 | 26.38 | 26.42 | 25.16 | 25.36 |
| GLI3-Hs00609233_m1   | 27.79 | 27.65 | 26.27 | 26.24 | 26.63 | 26.63 | 25.96 | 25.98 | 27.29 | 27.3  | 24.2  | 24.07 | 23.9  | 23.98 | 24.38 | 24.27 | 24.23 | 24.6  | 24.97 | 25.06 | 24.66 | 24.6  | 23.36 | 23.51 | 24.46 | 24.74 | 24.42 | 24.6  |
| GNL3-Hs00205071_m1   | 23.16 | 23.33 | 23.3  | 23.35 | 27.39 | 27.46 | 25.98 | 26.07 | 25    | 25.04 | 22.82 | 22.9  | 22.84 | 22.86 | 23.53 | 23.58 | 23.51 | 23.64 | 24.41 | 24.36 | 24.19 | 24.28 | 24.2  | 24.37 | 23.56 | 23.86 | 24.11 | 24.06 |
| GSX1-Hs00793699_g1   | 40    | 40    | 40    | 34.73 | 40    | 40    | 31.79 | 31.5  | 40    | 35    | 40    | 40    | 31.94 | 31.6  | 35.07 | 36.12 | 27.19 | 27.04 | 30.18 | 30.98 | 28.5  | 28.81 | 29.62 | 29.53 | 40    | 40    | 40    | 40    |
| GSX2-Hs00370195_m1   | 40    | 40    | 32.07 | 32.18 | 40    | 40    | 40    | 40    | 40    | 40    | 40    | 40    | 37.15 | 40    | 37.12 | 40    | 40    | 40    | 31.58 | 30.99 | 38.31 | 37.08 | 40    | 40    | 40    | 40    | 40    | 40    |
| HES1-Hs00172878_m1   | 29.34 | 29.46 | 29.22 | 29.13 | 27.66 | 27.5  | 26.66 | 26.41 | 28.83 | 28.88 | 26.77 | 26.65 | 26.44 | 26.51 | 27.17 | 27.15 | 27.09 | 26.96 | 26.41 | 26.42 | 26.37 | 26.35 | 26.64 | 26.7  | 27.36 | 27.6  | 25.84 | 25.91 |
| HES5-Hs01387463_g1   | 33.31 | 34.39 | 30.86 | 30.84 | 28.02 | 28.04 | 27.97 | 27.83 | 31.45 | 30.94 | 34.22 | 36.36 | 28.58 | 28.79 | 33.02 | 33.59 | 24.92 | 24.87 | 22.94 | 22.97 | 23.07 | 23.11 | 23.72 | 23.98 | 27.37 | 27.58 | 26.13 | 26.31 |
| HEY1-Hs00232618_m1   | 32.95 | 32.71 | 31.78 | 31.95 | 30.14 | 29.94 | 27.66 | 27.69 | 27.95 | 27.86 | 30.76 | 30.86 | 31.15 | 31.36 | 32.56 | 32.22 | 33.28 | 33.78 | 27.87 | 27.91 | 27.62 | 27.65 | 29.98 | 30.05 | 31.44 | 31.66 | 30.66 | 30.7  |
| HNF1B-Hs00172123_m1  | 30.5  | 30.48 | 33.98 | 34.86 | 40    | 40    | 40    | 40    | 40    | 40    | 40    | 40    | 40    | 40    | 40    | 40    | 40    | 40    | 40    | 40    | 40    | 40    | 40    | 40    | 40    | 40    | 40    | 40    |
| HOXA2-Hs00534579_m1  | 40    | 37.34 | 38.62 | 40    | 40    | 40    | 34.33 | 33.75 | 40    | 40    | 28.02 | 27.68 | 27.72 | 27.7  | 30.71 | 30.28 | 40    | 40    | 25.57 | 25.49 | 26.13 | 25.97 | 40    | 40    | 34.87 | 34.65 | 39.16 | 40    |
| HOXB2-Hs01911167_s1  | 29.99 | 29.95 | 27.6  | 27.44 | 26.38 | 26.24 | 29.36 | 29.08 | 26.83 | 26.77 | 23.93 | 23.85 | 21.77 | 21.98 | 25.03 | 25.16 | 36    | 40    | 22.76 | 22.83 | 22.97 | 23.09 | 40    | 36.41 | 24.46 | 24.58 | 27.31 | 27.4  |
| HOXB4-Hs00256884_m1  | 28.46 | 28.77 | 30.12 | 30.28 | 27.16 | 26.96 | 28.71 | 28.67 | 31.35 | 31.03 | 31.22 | 30.48 | 32.56 | 32.49 | 40    | 40    | 40    | 40    | 22.91 | 22.91 | 24.29 | 24.33 | 40    | 40    | 34.7  | 34.17 | 40    | 40    |
| HOXB8-Hs00256885_m1  | 40    | 40    | 40    | 40    | 40    | 40    | 40    | 36.61 | 40    | 40    | 32.53 | 32.81 | 40    | 40    | 40    | 40    | 40    | 40    | 35.51 | 34.74 | 35.41 | 35.23 | 40    | 40    | 40    | 40    | 40    | 40    |
| HOXB9-Hs00256886_m1  | 27.51 | 27.62 | 30.66 | 30.66 | 40    | 40    | 35.96 | 40    | 40    | 40    | 29.64 | 29.54 | 40    | 35.98 | 40    | 40    | 40    | 40    | 33.01 | 33.32 | 30.59 | 30.76 | 40    | 40    | 34.22 | 40    | 40    | 40    |



| Gene                  | Edi-2 | Edi-2 | DF-3F | DF-3F | CB541 | CB541 | CB660 | CB660 | CB192 | CB192 | AF22  | AF22  | AF23  | AF23  | AF24  | AF24  | PKb   | PKb   | PKc   | PKc   | Pka   | Pka   | PKd   | PKd   | I3    | I3    | H9.2  | H9.2  |
|-----------------------|-------|-------|-------|-------|-------|-------|-------|-------|-------|-------|-------|-------|-------|-------|-------|-------|-------|-------|-------|-------|-------|-------|-------|-------|-------|-------|-------|-------|
| NKX2-2-Hs00159616_m1  | 33.17 | 33.19 | 37.65 | 35.65 | 32.99 | 33.11 | 33.15 | 32.43 | 34.98 | 34.8  | 40    | 40    | 40    | 40    | 40    | 40    | 40    | 40    | 35.23 | 37.16 | 33.65 | 33.93 | 40    | 40    | 40    | 36.24 | 25.66 | 26.01 |
| NKX6-1-Hs00232355_m1  | 31.92 | 32.02 | 31.08 | 31.09 | 36.01 | 37.42 | 27.76 | 27.64 | 40    | 37.69 | 28.88 | 28.79 | 30.74 | 30.78 | 27.02 | 27.15 | 30.26 | 30.5  | 22.65 | 22.77 | 23.04 | 23.04 | 28.75 | 28.82 | 25.01 | 25.08 | 23.64 | 23.66 |
| NR1H2-Hs00173195_m1   | 27.66 | 27.45 | 27.12 | 27.17 | 29.11 | 29.15 | 28.4  | 28.31 | 27.3  | 27.52 | 27.48 | 27.49 | 26.8  | 26.8  | 27.98 | 28.05 | 27.39 | 27.34 | 27.43 | 27.44 | 27.81 | 27.86 | 26.85 | 27.05 | 27.93 | 28.03 | 27.53 | 27.46 |
| NR1H4-Hs00231968_m1   | 40    | 40    | 40    | 40    | 40    | 40    | 40    | 40    | 36.43 | 34.23 | 35.49 | 36.3  | 40    | 40    | 40    | 40    | 34.28 | 33.22 | 34.5  | 33.88 | 34.72 | 34.94 | 40    | 36.56 | 40    | 40    | 40    | 35.82 |
| NR2E1-Hs00172664_m1   | 34.71 | 34.13 | 40    | 36.39 | 35.42 | 35.72 | 28.51 | 28.52 | 32.88 | 33.56 | 40    | 40    | 40    | 40    | 40    | 40    | 40    | 40    | 40    | 40    | 40    | 40    | 40    | 37.77 | 40    | 40    | 40    | 40    |
| NR2F1-Hs00818842_m1   | 34.85 | 36.64 | 28.04 | 28.24 | 25.69 | 25.78 | 22.91 | 23.09 | 24.27 | 24.41 | 21.86 | 21.81 | 19.95 | 19.98 | 21.61 | 21.66 | 19.91 | 19.98 | 21.52 | 21.67 | 21.72 | 21.79 | 21.4  | 21.63 | 20.51 | 20.74 | 20.81 | 20.86 |
| NR2F2-Hs00819630_m1   | 34.92 | 33.45 | 28.4  | 28.41 | 25.01 | 24.99 | 22.82 | 22.86 | 24.84 | 24.9  | 21.78 | 21.75 | 22.17 | 22.07 | 22.08 | 22.08 | 21    | 20.91 | 23.11 | 23.07 | 23.48 | 23.49 | 22.17 | 22.01 | 21.97 | 21.88 | 21.7  | 21.59 |
| NR4A2-Hs00428691_m1   | 32.49 | 32.97 | 33.08 | 33.54 | 40    | 37.23 | 32.75 | 33.37 | 34.66 | 35.35 | 32.97 | 32.85 | 32.02 | 31.92 | 33.01 | 33.47 | 31.21 | 31.73 | 32.7  | 31.98 | 34    | 33.36 | 31.93 | 32.25 | 30.81 | 31.23 | 29.82 | 29.95 |
| NR4A3-Hs00545009_g1   | 33.78 | 33.44 | 30.73 | 31.16 | 31.91 | 32.02 | 32.42 | 32.73 | 32.9  | 33.5  | 31.48 | 31.11 | 28.99 | 29.28 | 30.22 | 30.16 | 28.51 | 28.61 | 30.83 | 31.04 | 30.81 | 31.55 | 25.49 | 25.54 | 29.41 | 29.01 | 28.53 | 28.69 |
| OLIG1-Hs00745341_s1   | 35.96 | 40    | 34.15 | 35.78 | 24.74 | 24.7  | 28.27 | 28.14 | 29.35 | 29.39 | 27.38 | 27.2  | 25.81 | 25.63 | 30.29 | 29.89 | 30.6  | 30.57 | 31.35 | 31.35 | 28.66 | 28.87 | 34.79 | 35.19 | 27.75 | 27.87 | 23.12 | 23.17 |
| OLIG2-Hs00300164_s1   | 36.38 | 40    | 33.72 | 34.13 | 27.21 | 27.35 | 29.08 | 28.98 | 29.61 | 29.67 | 28.86 | 29.42 | 27.28 | 27.62 | 31.19 | 32.07 | 31.85 | 32.23 | 31.86 | 32.45 | 30.11 | 30.57 | 38.19 | 36.16 | 28.09 | 28.26 | 24.99 | 25    |
| OTX1-Hs00951099_m1    | 30.48 | 30.91 | 30.09 | 30.29 | 33.54 | 34.64 | 30.01 | 29.77 | 25.65 | 25.78 | 29.36 | 29.44 | 33.89 | 32.91 | 29.26 | 29.7  | 24.9  | 25.11 | 32.54 | 32.67 | 28.74 | 28.78 | 27.36 | 27.53 | 26.26 | 26.13 | 25.15 | 25.07 |
| OTX2-Hs00222238_m1    | 24.09 | 23.87 | 23.62 | 23.68 | 28.13 | 28.19 | 27.17 | 26.99 | 24.91 | 24.99 | 40    | 36.97 | 36.57 | 40    | 40    | 36.93 | 33.78 | 34.45 | 30.48 | 30.65 | 36.84 | 40    | 40    | 36.29 | 40    | 36.2  | 34.44 | 36.37 |
| PAX2-Hs01057416_m1    | 35.11 | 36.75 | 40    | 34.72 | 40    | 40    | 28.66 | 28.5  | 40    | 40    | 35.52 | 40    | 40    | 40    | 40    | 40    | 40    | 40    | 28.87 | 28.99 | 35.36 | 34.37 | 37.87 | 40    | 40    | 40    | 40    | 40    |
| PAX3-Hs00992437_m1    | 38.2  | 36.43 | 34.26 | 38.1  | 40    | 40    | 33.41 | 33.93 | 40    | 40    | 28.29 | 28.4  | 25.75 | 25.86 | 28.26 | 28.71 | 34.6  | 34.38 | 29.81 | 29.83 | 29    | 29.04 | 27.9  | 28.48 | 31.81 | 31.78 | 40    | 40    |
| PAX6-Hs00240871_m1    | 29.69 | 29.76 | 31.15 | 30.41 | 34.33 | 36.34 | 27.54 | 27.55 | 27.73 | 27.84 | 27.24 | 27.5  | 24.23 | 24.27 | 25.75 | 25.57 | 22.23 | 22.19 | 22.7  | 22.85 | 23.23 | 23.32 | 24.23 | 24.37 | 24.26 | 24.27 | 24.62 | 24.76 |
| PAX7-Hs00242962_m1    | 35.69 | 34.49 | 40    | 40    | 40    | 40    | 31.65 | 31.76 | 40    | 40    | 36.55 | 35.68 | 32.17 | 32.24 | 40    | 40    | 34.73 | 36.36 | 31.5  | 31.45 | 31.16 | 31.52 | 27.81 | 27.87 | 40    | 40    | 40    | 40    |
| PDGFRA-Hs00183486_m1  | 29.81 | 29.97 | 33.77 | 32.35 | 40    | 40    | 33.48 | 32.49 | 31.98 | 33.8  | 28.98 | 28.97 | 27.98 | 28.05 | 28.19 | 28.26 | 29.56 | 29.54 | 28.85 | 28.91 | 28.87 | 28.83 | 40    | 40    | 40    | 40    | 40    | 40    |
| PDGFRB-Hs00387364_m1  | 28.46 | 28.56 | 28.76 | 29.05 | 27.5  | 27.51 | 24.73 | 24.79 | 28.79 | 28.93 | 24.48 | 24.87 | 24.99 | 25.02 | 25.39 | 25.46 | 26.04 | 26.39 | 24.38 | 24.65 | 25.42 | 25.75 | 26.28 | 26.43 | 25.15 | 25.32 | 24.62 | 24.74 |
| PELP1-Hs00413506_gH   | 23.69 | 23.6  | 23.49 | 23.37 | 26.79 | 26.89 | 25.71 | 25.71 | 25.62 | 23.61 | 23.64 | 22.55 | 22.58 | 24.33 | 24.34 | 23.23 | 23.32 | 23.75 | 23.76 | 24.02 | 24.12 | 23.24 | 23.52 | 24.71 | 24.7  | 23.55 | 23.41 |       |
| PHOX2A-Hs00605931_mH  | 32.53 | 32.39 | 30.58 | 31.23 | 40    | 40    | 40    | 36.21 | 36.98 | 34.43 | 32.66 | 33.66 | 28.61 | 28.92 | 31.8  | 32.15 | 32.53 | 32.96 | 31.04 | 31.57 | 29.73 | 29.79 | 33.88 | 34.42 | 30.26 | 30.31 | 30.52 | 30.91 |
| PITX3-Hs00374504_m1   | 32.62 | 31.69 | 31.19 | 30.9  | 40    | 40    | 31.27 | 31.48 | 40    | 40    | 32.68 | 40    | 33.42 | 33.65 | 32.72 | 33.7  | 30.93 | 30.79 | 33.88 | 35.56 | 32.44 | 32.92 | 34.49 | 35.79 | 33.06 | 32.51 | 34.79 | 34.37 |
| PKNOX1-Hs00231814_m1  | 26.75 | 26.91 | 26.69 | 26.61 | 29.27 | 29.67 | 28.16 | 28.32 | 27.54 | 27.66 | 26.15 | 26.19 | 26.52 | 26.46 | 27.24 | 27.43 | 27.54 | 27.53 | 26.17 | 26.06 | 26.27 | 26.27 | 26.5  | 26.55 | 27.98 | 27.94 | 26.52 | 26.75 |
| PLAG1-Hs00231236_m1   | 32.57 | 33.65 | 30.13 | 30.03 | 33.71 | 32.6  | 30.99 | 31.65 | 33.52 | 34.06 | 29.23 | 29.56 | 29.65 | 30.09 | 29.69 | 29.82 | 29.74 | 29.49 | 30.52 | 29.95 | 29.18 | 29.06 | 30.55 | 30.81 | 29.73 | 29.86 | 29.25 | 29.06 |
| PMP2-Hs00160204_m1    | 40    | 40    | 40    | 37.21 | 35.98 | 35.98 | 32.97 | 33.13 | 30.03 | 29.95 | 40    | 35.59 | 40    | 40    | 40    | 35.65 | 36.64 | 37.33 | 31.76 | 31.96 | 30.08 | 30.23 | 36.32 | 35.46 | 40    | 40    | 35.26 | 36.55 |
| POU3F1-Hs00538614_s1  | 32.48 | 32.31 | 31.4  | 31.51 | 32.76 | 32.64 | 32.66 | 33.01 | 36.3  | 36.72 | 27.05 | 27.17 | 26.53 | 26.56 | 28.4  | 28.46 | 28.68 | 28.82 | 31.86 | 31.94 | 31.23 | 31.11 | 27.46 | 27.41 | 28.42 | 28.18 | 27.55 | 27.36 |
| POU3F2-Hs00271595_s1  | 34.95 | 34.68 | 27.85 | 28.01 | 27.52 | 27.77 | 27.5  | 27.6  | 24.56 | 24.65 | 23.4  | 23.48 | 22.23 | 22.27 | 23.74 | 23.81 | 22.58 | 22.62 | 22.95 | 23.07 | 22.98 | 23.02 | 22.89 | 23.05 | 23.75 | 24.02 | 23.54 | 23.63 |
| POU3F3-Hs00275987_s1  | 36.13 | 38.63 | 32.45 | 32.76 | 27.52 | 27.35 | 28.51 | 28.59 | 27.51 | 27.48 | 25.82 | 25.78 | 25.62 | 25.56 | 26.21 | 26.07 | 26.66 | 26.56 | 26.72 | 26.71 | 25.92 | 25.7  | 25.29 | 25.07 | 27.5  | 27.33 | 25.31 | 25.28 |
| POU3F4-Hs00264887_s1  | 35.77 | 40    | 30.91 | 30.92 | 40    | 40    | 27.97 | 27.83 | 29.56 | 29.56 | 26.61 | 26.59 | 27.1  | 26.97 | 29.39 | 29.49 | 24.33 | 24.25 | 25.69 | 25.57 | 40    | 40    | 24.93 | 24.82 | 25.68 | 25.7  | 29.77 | 29.44 |
| POU4F1-Hs00366711_m1  | 35.89 | 40    | 33.63 | 37.97 | 40    | 40    | 36.26 | 36.28 | 40    | 36.29 | 35.07 | 36.51 | 35.29 | 34.4  | 36.35 | 35.53 | 34.99 | 35.56 | 35.04 | 33.28 | 34.17 | 33.27 | 34.49 | 34.03 | 36.16 | 34.72 | 34.68 | 34.22 |
| POU6F1-Hs00231276_m1  | 29.43 | 29.49 | 29.61 | 29.51 | 33.17 | 32.73 | 30.87 | 30.75 | 30.51 | 30.42 | 29.73 | 29.57 | 29.57 | 29.7  | 30.34 | 30.36 | 29.29 | 29.49 | 28.13 | 28.36 | 28.87 | 28.95 | 29.5  | 30.26 | 29.7  | 29.93 | 29.64 | 29.98 |
| PPP1R1B-Hs00259967_m1 | 30.7  | 30.58 | 28.09 | 28.06 | 35.75 | 38.03 | 33.1  | 32.84 | 34.58 | 34.6  | 37.94 | 38.08 | 33.23 | 33.7  | 36.3  | 34.84 | 35.84 | 33.99 | 31.94 | 31.93 | 36.75 | 37.97 | 38.42 | 38.47 | 35.53 | 35.66 | 38.29 | 37.93 |
| PROM1-Hs01009259_m1   | 26.61 | 26.77 | 27.31 | 26.83 | 40    | 40    | 31.16 | 30.99 | 29.88 | 29.6  | 25.39 | 25.29 | 25.75 | 25.82 | 26.1  | 26.17 | 26.01 | 26.11 | 25.13 | 24.92 | 26.61 | 26.59 | 24.27 | 24.5  | 26.06 | 26.69 | 24.71 | 25.32 |
| PTEN-Hs02621230_s1    | 28.53 | 28.75 | 28.01 | 28.32 | 27.28 | 27.38 | 27.97 | 27.94 | 28.31 | 28.28 | 27.08 | 27.05 | 26.84 | 26.88 | 27.82 | 27.84 | 27.29 | 27.49 | 27.35 | 27.46 | 27.51 | 27.37 | 27.79 | 27.98 | 27.25 | 27.66 | 28.36 | 28.39 |
| PTN-Hs01085691_m1     | 24.08 | 24.02 | 21.66 | 21.72 | 22.98 | 23.04 | 21.64 | 21.63 | 19.34 | 19.37 | 16.59 | 16.87 | 17.39 | 17.54 | 17.6  | 17.85 | 19.09 | 18.97 | 20.15 | 20.36 | 21.01 | 21.02 | 19.05 | 19.01 | 20.52 | 20.47 | 20.61 | 20.75 |
| PVALB-Hs00161045_m1   | 32.82 | 33.1  | 29.86 | 30.09 | 40    | 40    | 35.16 | 35.25 | 40    | 40    | 26.49 | 26.46 | 25.75 | 25.43 | 26.08 | 25.96 | 27.11 | 26.8  | 40    | 35.51 | 36.08 | 36.25 | 29.22 | 29.18 | 27.12 | 26.81 | 26.36 | 26.56 |
| RB1-Hs00153108_m1     | 26.23 | 26.27 | 25.56 | 25.64 | 25.88 | 25.97 | 25.53 | 25.57 | 24.99 | 25.15 | 24.38 | 24.52 | 23.87 | 23.87 | 24.98 | 24.85 | 24.06 | 23.95 | 23.88 | 23.79 | 24.02 | 23.93 | 24.85 | 24.98 | 24.97 | 25.22 | 25.18 | 25.07 |
| REST-Hs00958503_m1    | 23.15 | 23.01 | 23.83 | 23.8  | 26.19 | 26.09 | 25.25 | 25.4  | 25.16 | 25.04 | 23.57 | 23.53 | 23.67 | 23.55 | 24.41 | 24.25 | 24.04 | 23.97 | 24.96 | 24.83 | 25.26 | 25.17 | 24.96 | 24.98 | 25.26 | 24.98 | 25.71 | 25.67 |
| RFX3-Hs00231292_m1    | 27.13 | 27.08 | 26.71 | 26.84 | 26.83 | 26.84 | 25.87 | 25.85 | 26    | 25.94 | 25.07 | 24.96 | 24.26 | 24.28 | 25.08 | 25.21 | 23.91 | 24.07 | 24.4  | 24.59 | 24.35 | 24.44 | 23.78 | 23.81 | 25.47 | 25.4  | 24.48 | 24.4  |
| RSPO3-Hs00262176_m1   | 29.4  | 28.99 | 33.66 | 34.02 | 36.58 | 40    | 36.99 | 35.16 | 40    | 40    | 31    | 30.94 | 33.66 | 32.99 | 34.25 | 34.25 | 34.9  | 35.1  | 32.82 | 32.25 | 33.09 | 34.45 | 33.97 | 32.96 | 36.74 | 34.85 | 36.78 | 40    |

| Gene                  | Edi-2 | Edi-2 | DF-3F | DF-3F | CB541 | CB541 | CB660 | CB660 | CB192 | CB192 | AF22  | AF22  | AF23  | AF23  | AF24  | AF24  | PKb   | PKb   | PKc   | PKc   | Pka   | Pka   | PKd   | PKd   | I3    | I3    | H9.2  | H9.2  |
|-----------------------|-------|-------|-------|-------|-------|-------|-------|-------|-------|-------|-------|-------|-------|-------|-------|-------|-------|-------|-------|-------|-------|-------|-------|-------|-------|-------|-------|-------|
| RUNX3-Hs00231709_m1   | 30.73 | 30.95 | 30.87 | 31.4  | 40    | 40    | 40    | 40    | 40    | 40    | 36.9  | 36.27 | 35.41 | 36.04 | 36.92 | 34.89 | 34.82 | 34.02 | 36.7  | 36.01 | 33.68 | 33.36 | 40    | 40    | 35.84 | 35.7  | 37.69 | 36.92 |
| RXRA-Hs00172565_m1    | 25.61 | 25.67 | 25.42 | 25.68 | 26.89 | 26.93 | 26.09 | 26.07 | 25.94 | 26    | 24.32 | 24.24 | 24.27 | 24.28 | 24.9  | 24.93 | 24.89 | 24.89 | 24.75 | 24.73 | 24.86 | 24.83 | 24.23 | 24.27 | 25.42 | 25.46 | 24.37 | 24.4  |
| RXRG-Hs00199455_m1    | 30.34 | 30.58 | 32.84 | 33.93 | 40    | 40    | 34.57 | 35.24 | 40    | 40    | 35.88 | 36    | 33.55 | 35.19 | 34.35 | 35.11 | 32.6  | 33.47 | 29.17 | 29.18 | 30.61 | 30.43 | 40    | 40    | 40    | 40    | 40    | 40    |
| S100B-Hs00902901_m1   | 35.73 | 34.95 | 29.18 | 29.1  | 22.72 | 22.98 | 25.25 | 25.27 | 24.55 | 24.71 | 26.11 | 26.22 | 22.95 | 23.14 | 26.44 | 26.85 | 27.26 | 27.5  | 25.38 | 25.61 | 25.84 | 25.8  | 28.56 | 28.96 | 27.63 | 27.62 | 29.76 | 30.03 |
| SHC1-Hs00427539_m1    | 23.27 | 23.32 | 23.64 | 23.69 | 24.84 | 24.87 | 23.99 | 23.94 | 23.05 | 23.3  | 21.76 | 21.59 | 22.33 | 22.37 | 23.23 | 22.98 | 24.8  | 24.55 | 25.53 | 25.68 | 24.57 | 24.82 | 24.63 | 24.27 | 24.59 | 24.87 | 23.08 | 23.31 |
| SHC3-Hs00179650_m1    | 27.66 | 27.24 | 28.47 | 28.35 | 26.87 | 26.95 | 25.96 | 25.96 | 26.92 | 26.83 | 24.25 | 24.39 | 24.55 | 24.36 | 24.83 | 24.8  | 24.61 | 24.44 | 24.86 | 24.69 | 24.66 | 24.49 | 25.32 | 25.41 | 24.92 | 24.89 | 24.66 | 24.51 |
| SHH-Hs01123832_m1     | 33.07 | 33.13 | 35.42 | 37.2  | 32.81 | 32.2  | 28.76 | 28.69 | 35.66 | 35.86 | 40    | 40    | 40    | 40    | 40    | 40    | 40    | 40    | 40    | 40    | 40    | 40    | 40    | 40    | 40    | 40    | 40    | 40    |
| SIX3-Hs00193667_m1    | 35.87 | 34.48 | 30.8  | 30.71 | 24.77 | 24.69 | 22.92 | 22.79 | 32.5  | 35.52 | 40    | 40    | 36.31 | 40    | 36.4  | 34.86 | 27.17 | 27.05 | 30.52 | 31.33 | 40    | 40    | 34.91 | 35.91 | 33.36 | 32.99 | 33.69 | 34.11 |
| SLC1A1-Hs00188172_m1  | 28.32 | 28.25 | 29.06 | 28.8  | 40    | 34.51 | 31.84 | 31.87 | 30.8  | 30.46 | 28.24 | 28.19 | 31.29 | 30.83 | 29.17 | 28.95 | 32.33 | 32.67 | 32.66 | 32.7  | 33.54 | 34.56 | 35.75 | 35.16 | 31.42 | 31.49 | 29.15 | 29.1  |
| SOX10-Hs00199510_m1   | 32.82 | 32.6  | 31.31 | 31.11 | 38.15 | 40    | 40    | 38.07 | 40    | 40    | 39.77 | 40    | 38.2  | 40    | 40    | 40    | 40    | 40    | 39.42 | 39.54 | 39.09 | 39.44 | 40    | 40    | 38.93 | 38.13 | 28.68 | 40    |
| SOX1-Hs01057642_s1    | 40    | 40    | 36.32 | 35.05 | 31.54 | 31.56 | 31.1  | 31.04 | 32.95 | 33.03 | 30.94 | 31.08 | 30.82 | 30.89 | 29.84 | 29.74 | 27.98 | 27.94 | 29.51 | 29.48 | 30.27 | 30.71 | 28.17 | 28.82 | 29.43 | 29.18 | 29.26 | 29.7  |
| SOX21-Hs00359892_s1   | 34.16 | 34.18 | 31.64 | 31.99 | 32.42 | 32.76 | 33.19 | 32.85 | 31.67 | 31.84 | 33.64 | 34.03 | 30.59 | 30.81 | 32.44 | 32.65 | 29.19 | 29.52 | 31.52 | 31.5  | 31.66 | 31.86 | 29.98 | 30.41 | 31.23 | 31.13 | 31.31 | 31.48 |
| SOX2-Hs00602736_s1    | 27.79 | 28.3  | 27.51 | 27.1  | 29.27 | 29.16 | 28.07 | 27.97 | 28.38 | 28.16 | 27.14 | 26.55 | 26.6  | 26.37 | 26.96 | 27.13 | 26.21 | 26.38 | 26.14 | 26.94 | 27.24 | 27.29 | 26.24 | 26.78 | 27.53 | 27.8  | 26.91 | 27.62 |
| SOX3-Hs00271627_s1    | 33.6  | 32.7  | 33.81 | 33.46 | 36.73 | 36.17 | 35.07 | 33.98 | 40    | 40    | 35.05 | 34.87 | 29.7  | 29.67 | 33.17 | 32.34 | 28.35 | 27.64 | 27.7  | 27.04 | 27.49 | 26.94 | 26.03 | 25.55 | 28.62 | 27.9  | 27.9  | 27.3  |
| SOX5-Hs00753050_s1    | 31.11 | 30.96 | 29.13 | 29.36 | 27.19 | 27.13 | 26.1  | 26.07 | 28.5  | 28.44 | 26.2  | 26.19 | 26.19 | 26.4  | 26.76 | 26.67 | 26.17 | 26    | 26.85 | 26.94 | 26.78 | 26.92 | 25.77 | 26.08 | 26.92 | 27.01 | 26.5  | 26.56 |
| SOX6-Hs00264525_m1    | 32.41 | 32.67 | 34.23 | 33.77 | 31.28 | 31.98 | 28.52 | 28.55 | 30.64 | 30.69 | 27.62 | 27.54 | 27.99 | 27.91 | 28.78 | 28.58 | 28.98 | 29.32 | 27.48 | 27.44 | 30.63 | 30.7  | 28.82 | 28.86 | 30.23 | 30.6  | 28.97 | 28.95 |
| SOX8-Hs00232723_m1    | 30.96 | 30.68 | 27.52 | 27.73 | 28.21 | 28.18 | 26.68 | 26.74 | 27.28 | 27.15 | 26.14 | 26.08 | 26.61 | 26.75 | 27.4  | 27.36 | 27.38 | 27.48 | 25.86 | 25.95 | 25.81 | 25.97 | 25.08 | 25.63 | 26.19 | 26.49 | 23.98 | 24.15 |
| SOX9-Hs00165814_m1    | 28.88 | 28.98 | 25.85 | 25.82 | 24.96 | 25    | 24.22 | 24.23 | 24.15 | 24.15 | 21.92 | 21.98 | 22.43 | 22.43 | 23.66 | 23.51 | 23.99 | 23.97 | 22.43 | 22.29 | 23.48 | 23.49 | 25.71 | 25.73 | 24.69 | 24.72 | 24.85 | 24.7  |
| SPARCL1-Hs00190740_m1 | 33.14 | 34.28 | 29.79 | 30.05 | 23.69 | 23.62 | 20.95 | 20.89 | 25.99 | 26.06 | 27.48 | 27.66 | 23.79 | 23.78 | 24.72 | 24.85 | 24    | 23.95 | 24.69 | 24.7  | 25.02 | 25.07 | 26.7  | 27.42 | 26.85 | 27    | 25.14 | 25    |
| SREBF1-Hs01088691_m1  | 27.97 | 27.91 | 27.35 | 27.46 | 27.38 | 27.38 | 26.77 | 26.63 | 26.48 | 26.36 | 25.73 | 25.79 | 24.55 | 24.94 | 26.21 | 26.19 | 24.36 | 24.81 | 24.99 | 24.74 | 24.4  | 24.24 | 24.74 | 24.56 | 25.59 | 25.7  | 24.78 | 24.63 |
| SYN1-Hs00199577_m1    | 29.24 | 29.34 | 28.44 | 28.6  | 30.3  | 30.13 | 30.3  | 30.39 | 31.94 | 32.58 | 27.77 | 27.98 | 27.09 | 27.32 | 29.13 | 29.37 | 29.29 | 29.51 | 26.81 | 26.79 | 27.01 | 27.22 | 30.17 | 30.12 | 29.12 | 28.75 | 29.52 | 29.81 |
| SYP-Hs00300531_m1     | 32.95 | 33.27 | 30.24 | 30.32 | 32.86 | 32.74 | 31.03 | 31.03 | 33.47 | 34.25 | 31.38 | 31.99 | 30.36 | 30.75 | 31.05 | 31.67 | 30.25 | 30.14 | 27.98 | 28.1  | 27.69 | 27.63 | 28.29 | 28.53 | 30.33 | 30.5  | 31.49 | 31.28 |
| TBR1-Hs00232429_m1    | 40    | 35.63 | 35.48 | 40    | 40    | 35.12 | 35.72 | 40    | 33.98 | 34.77 | 35.65 | 34.5  | 34.99 | 34.73 | 35.92 | 35.78 | 34.6  | 40    | 35.31 | 40    | 40    | 35.7  | 32.85 | 33.42 | 36.6  | 34.77 | 35.46 | 34.62 |
| TCF12-Hs00175295_m1   | 25.58 | 25.36 | 24.8  | 25.12 | 26.1  | 25.97 | 25.38 | 25.34 | 25.05 | 25.12 | 23.47 | 23.39 | 23.28 | 23.33 | 23.89 | 23.98 | 23.68 | 23.79 | 23.74 | 23.76 | 23.97 | 23.96 | 23.53 | 23.52 | 24.73 | 24.74 | 23.95 | 23.98 |
| TCF4-Hs00162613_m1    | 25.71 | 25.87 | 25.14 | 25.18 | 27.42 | 27.49 | 26.04 | 26.09 | 26.64 | 26.73 | 23.84 | 23.94 | 24.18 | 24.14 | 24.55 | 24.6  | 24.27 | 24.46 | 24.37 | 24.37 | 24.54 | 24.35 | 24.44 | 24.73 | 25.52 | 25.58 | 25.04 | 25.23 |
| TCF7L2-Hs00181036_m1  | 24.99 | 24.97 | 23.31 | 23.45 | 25.3  | 25.26 | 24.63 | 24.58 | 24.89 | 24.76 | 23.23 | 23.21 | 22.81 | 22.98 | 23.6  | 23.79 | 22.71 | 22.75 | 23.48 | 23.52 | 23.81 | 23.9  | 23.29 | 23.42 | 23.68 | 23.78 | 23.63 | 23.56 |
| TERT-Hs00972646_m1    | 29.69 | 29.73 | 27.16 | 27.28 | 40    | 40    | 40    | 40    | 40    | 40    | 32.51 | 32.41 | 35.48 | 34.41 | 30.73 | 30.97 | 29.42 | 29.68 | 34.12 | 33.32 | 31.85 | 31.99 | 30.87 | 30.35 | 30.22 | 30.51 | 29.22 | 29.25 |
| TFDP1-Hs00955491_gH   | 25.02 | 24.89 | 25.76 | 24.95 | 27.25 | 27.47 | 26.12 | 26.31 | 25.35 | 25.31 | 23.76 | 23.62 | 23.61 | 23.14 | 24.6  | 24.06 | 24.44 | 24    | 24.82 | 24.73 | 24.97 | 24.99 | 23.75 | 23.41 | 25.39 | 25.29 | 24.7  | 24.4  |
| TH-Hs00165941_m1      | 40    | 36.63 | 33.04 | 33.09 | 31.7  | 31.83 | 32.09 | 31.98 | 31.14 | 30.91 | 34.79 | 34.78 | 33.45 | 32.97 | 35.64 | 35.9  | 36.47 | 40    | 29.41 | 29.91 | 29.51 | 29.49 | 40    | 40    | 35.35 | 34.89 | 39.05 | 40    |
| TP53-Hs00153340_m1    | 23.05 | 22.99 | 22.93 | 22.9  | 25.9  | 25.97 | 24.61 | 24.64 | 24.09 | 24.1  | 22    | 22.11 | 21.55 | 21.68 | 22.54 | 22.57 | 22.53 | 22.65 | 23.06 | 23.14 | 23.19 | 23.14 | 22.03 | 22.25 | 25.73 | 25.53 | 21.69 | 21.85 |
| TSC22D4-Hs00229526_m1 | 25.37 | 25.41 | 24.99 | 25    | 26.74 | 26.72 | 25.9  | 25.84 | 25.8  | 25.77 | 24.46 | 24.56 | 23.82 | 23.86 | 24.92 | 25.43 | 24.47 | 24.67 | 24.7  | 24.91 | 25.07 | 24.99 | 25.33 | 25.39 | 25.11 | 25.25 | 25.56 | 25.53 |
| TUBB3-Hs00964965_m1   | 40    | 40    | 40    | 34.95 | 36.66 | 40    | 35.94 | 36.97 | 35.53 | 40    | 40    | 36.97 | 36.95 | 40    | 37.05 | 36.78 | 36.55 | 37.15 | 34.42 | 36.39 | 34.67 | 35.03 | 34.81 | 35.15 | 40    | 40    | 35.29 | 36.96 |
| ZBTB16-Hs00232313_m1  | 36.31 | 34.33 | 32.76 | 32.64 | 27.77 | 27.66 | 29.98 | 29.52 | 30.36 | 30.27 | 25.23 | 25.05 | 24.11 | 24.02 | 25.1  | 25.01 | 23.93 | 23.81 | 25.87 | 25.94 | 25.11 | 24.87 | 24.05 | 24.19 | 25.17 | 25.04 | 24.75 | 24.76 |
| ZFXH3-Hs00199344_m1   | 30.15 | 29.6  | 28.84 | 28.88 | 30.22 | 30.79 | 27.81 | 27.78 | 27.68 | 27.91 | 25.87 | 25.97 | 25.18 | 25.16 | 25.13 | 24.96 | 24.22 | 24.22 | 24.48 | 24.61 | 24.63 | 24.49 | 24.38 | 24.16 | 25.44 | 25.34 | 25.35 | 25.4  |
